# Supplementary material for: Conserved miRNAs and Their Response to Salt Stress in Wild Eggplant Solanum linnaeanum Roots
Source: PubMed Central journal article supplement (PMC3907842; doi:10.3390/ijms15010839), 2014-01-09
Supplement: ijms-15-00839-s001.pdf [file ijms-15-00839-s001.pdf]

## Supplementary Information

**Table S1.** Length distribution of mappable reads.

| Length | CK        |             | TR        |             |
|--------|-----------|-------------|-----------|-------------|
|        | Reads     | Percent (%) | Reads     | Percent (%) |
| 15     | 415,544   | 5.00        | 460,556   | 5.21        |
| 16     | 318,260   | 3.83        | 339,920   | 3.85        |
| 17     | 284,070   | 3.42        | 344,876   | 3.90        |
| 18     | 422,230   | 5.08        | 472,581   | 5.35        |
| 19     | 288,068   | 3.47        | 261,274   | 2.96        |
| 20     | 366,351   | 4.41        | 366,209   | 4.15        |
| 21     | 894,463   | 10.76       | 799,295   | 9.05        |
| 22     | 548,725   | 6.60        | 474,535   | 5.37        |
| 23     | 536,209   | 6.45        | 515,376   | 5.83        |
| 24     | 1,798,032 | 21.64       | 1,772,935 | 20.07       |
| 25     | 452,080   | 5.44        | 499,965   | 5.66        |
| 26     | 356,904   | 4.29        | 423,854   | 4.80        |
| 27     | 392,512   | 4.72        | 497,906   | 5.64        |
| 28     | 403,207   | 4.85        | 477,987   | 5.41        |
| 29     | 400,644   | 4.82        | 534,469   | 6.05        |
| 30     | 433,305   | 5.21        | 590,820   | 6.69        |

**Table S2.** Conserved miRNAs in *S. linnaeanum* roots.

| Name        | Mature miRNA             | ML | CK reads | TR reads | Log <sub>2</sub> (TR/CK) |
|-------------|--------------------------|----|----------|----------|--------------------------|
| sli-miR156a | GCTCACTGCTCTATCTGTCACC   | 22 | 37       | 36       | -0.02                    |
| sli-miR156b | TGACAGAAGAGAGTGAGCAC     | 20 | 55       | 27       | -1.01                    |
| sli-miR156c | TTGACAGAAGATAGAGAGCAC    | 21 | 284      | 126      | -1.18                    |
| sli-miR156d | GCTCTCTATGCTTCTGTCATC    | 21 | 3        | 5        | 0.64                     |
| sli-miR156e | GCTCACTTCTCATTCTGTCAGC   | 22 | 4        | 6        | 0.45                     |
| sli-miR159a | TTTGGATTGAAGGGAGCTCTT    | 21 | 43       | 57       | 0.42                     |
| sli-miR159b | TTTGGATTGAAGGGAGCTCTA    | 21 | 3,932    | 5,618    | 0.51                     |
| sli-miR159c | AGCTGCTGACCTATGGATTCC    | 21 | 2,052    | 1,664    | -0.30                    |
| sli-miR159d | TTTGGATTGAAGGGAGCTCTAC   | 22 | 5        | 1        | -2.14                    |
| sli-miR160a | TGCCTGGCTCCCTGTATGCCA    | 21 | 158      | 134      | -0.24                    |
| sli-miR160b | GCGTATGAGGAGCCAAGCATA    | 21 | 39       | 27       | -0.52                    |
| sli-miR162a | TCGATAAACCTCTGCATCCAGA   | 22 | 14       | 11       | -0.38                    |
| sli-miR162b | TCGATAAACCTCTGCATCCAGT   | 22 | 47       | 20       | -1.25                    |
| sli-miR162c | TCGATAAACCTCTGCATCCAG    | 21 | 4,448    | 2,777    | -0.68                    |
| sli-miR162d | GGAGGCAGCGGTTTCATCGATC   | 21 | 116      | 83       | -0.49                    |
| sli-miR164a | TGGAGAAGCAGGGCACGTGCAC   | 22 | 11       | 6        | -0.93                    |
| sli-miR164b | TGGAGAAGCAGGGCACGTGCA    | 21 | 265      | 177      | -0.58                    |
| sli-miR164c | TGGAGAAGCAGGGCACATGCTG   | 22 | 5        | 11       | 1.03                     |
| sli-miR165a | CCGGACCAGGCTTCATTCCCC    | 21 | 293      | 374      | 0.35                     |
| sli-miR165b | ACTCGGACCAGGCTTCA        | 17 | 3        | 11       | 2.03                     |
| sli-miR166a | CCTCGGACCAGGCTTCATTCC    | 21 | 66       | 77       | 0.23                     |
| sli-miR166b | TCGGACCAGGCTTCATTCCT     | 20 | 63       | 45       | -0.49                    |
| sli-miR166c | ATCTCGGACCAGGCTTCATTCCCC | 24 | 12       | 12       | 0.00                     |

Table S2. Cont.

| Name        | Mature miRNA             | ML | CK reads | TR reads | Log <sub>2</sub> (TR/CK) |
|-------------|--------------------------|----|----------|----------|--------------------------|
| sli-miR166d | TCTCGGACCAGGCTCCATTCC    | 21 | 7        | 27       | 1.97                     |
| sli-miR166e | TCGGACCAGGCTTCATTCCCC    | 21 | 88,288   | 113,090  | 0.36                     |
| sli-miR166f | GGAATGTTGTCTGGCTCGAGG    | 21 | 16,303   | 13,291   | -0.29                    |
| sli-miR166g | TCGGACCAGGCTTCATTCCCTC   | 21 | 2,732    | 2,877    | 0.07                     |
| sli-miR166h | TCTCGGANCAGGCTTCATTCC    | 21 | 776      | 943      | 0.28                     |
| sli-miR166i | TCGGACCAGGCTTCATTCCCCA   | 22 | 9        | 5        | -1.01                    |
| sli-miR166j | TCTCGGATCAGGCTTCATTCC    | 21 | 8        | 6        | -0.40                    |
| sli-miR166k | AGGCGTCGGACCAGGCTTCATTCC | 24 | 5        | 5        | -0.14                    |
| sli-miR167a | TGAAGCTGCCAGCATGATCTGG   | 22 | 740      | 271      | -1.45                    |
| sli-miR167b | GATCATGTGGTAGCCTCACC     | 20 | 11       | 5        | -1.25                    |
| sli-miR167c | TTGAAGCTGCCAGCATGATCTG   | 22 | 14       | 9        | -0.55                    |
| sli-miR167d | TGAAGCTGCCAGCATGATCT     | 20 | 110      | 117      | 0.08                     |
| sli-miR168a | TCGCTTGGTGCAGGTCGGGAA    | 21 | 1,145    | 1,163    | 0.02                     |
| sli-miR168b | TCGCTTGGTGCAGGTCGGGA     | 20 | 122      | 228      | 0.90                     |
| sli-miR168c | TTGCATCAACTGAATCGGAGA    | 21 | 24       | 19       | -0.36                    |
| sli-miR168d | TCTAATTCGCTTGGTGCAGGT    | 21 | 18       | 26       | 0.51                     |
| sli-miR169a | TTTGATAGCCAAGGATGACT     | 20 | 12       | 9        | -0.40                    |
| sli-miR169b | TAGCCAAGGATGACTTGCCT     | 20 | 2        | 6        | 1.45                     |
| sli-miR169c | TGGATTGCAGCCAAGGATGAC    | 21 | 1        | 5        | 2.62                     |
| sli-miR171a | CGATATTGGTGAGGTTCAATC    | 21 | 13       | 12       | -0.14                    |
| sli-miR171b | TTGAGCCGCGTCAATATCTCT    | 21 | 27       | 12       | -1.18                    |
| sli-miR171c | CGATGTTGGTGAGGTTCAATC    | 21 | 16       | 27       | 0.72                     |
| sli-miR171d | TGAGCCGAACCAATATCACTC    | 21 | 32       | 56       | 0.82                     |
| sli-miR171e | TTGAGCCGCGCCAATATCACT    | 21 | 10       | 5        | -1.08                    |
| sli-miR171f | TGATTGAGCCGTGCCAATATC    | 21 | 8        | 6        | -0.40                    |
| sli-miR171g | TAATTTGATTGAGCCGTGCC     | 20 | 1        | 5        | 2.45                     |
| sli-miR172a | GGAATCTTGATGATGCTGCAT    | 21 | 27       | 9        | -1.66                    |
| sli-miR172b | AGAATCTTGATGATGCTGCAT    | 21 | 5        | 1        | -3.14                    |
| sli-miR172c | GTAGCATCATCAAGATTCATA    | 21 | 3        | 7        | 1.45                     |
| sli-miR305  | CTGAAGTGTTTGGGGGAACCTC   | 21 | 5        | 2        | -1.55                    |
| sli-miR319a | TTGGACTGAAGGGAGCTCCTT    | 21 | 17       | 8        | -1.07                    |
| sli-miR319b | TGTGAATGATGCGGGAGATAA    | 21 | 25       | 25       | -0.02                    |
| sli-miR319c | CTTGGACTGAAGGGAGCTCCC    | 21 | 420      | 603      | 0.52                     |
| sli-miR319d | TTGCTGCCGACTCATTCATCCA   | 22 | 79       | 110      | 0.48                     |
| sli-miR390a | AAGCTCAGGAGGGATAGCGCC    | 21 | 73       | 58       | -0.32                    |
| sli-miR390b | AAGCTCAGGAGGGATAGCACC    | 21 | 241      | 182      | -0.41                    |
| sli-miR390c | CGCTATCCATCCTGAGTTCT     | 20 | 5        | 0        | -12.33                   |
| sli-miR390d | TATAGCGCTATCCATCCTGAG    | 21 | 7        | 5        | -0.55                    |
| sli-miR394  | TTTGGCATTCTGTCCACCTCC    | 21 | 13       | 12       | -0.14                    |
| sli-miR396a | TCCACAGGCTTTCTTGAACCTG   | 21 | 18       | 14       | -0.36                    |
| sli-miR396b | TTCCACAGCTTTCTTGAAC      | 19 | 12       | 4        | -1.49                    |
| sli-miR396c | TTCCACAGCTTTCTTGAACCTT   | 21 | 570      | 503      | -0.18                    |
| sli-miR396d | CAGCTTTCTTGAACCTG        | 16 | 9,365    | 20,458   | 1.13                     |
| sli-miR396e | TTCCACAGCTTTCTTGAACCTTTT | 23 | 9        | 8        | -0.14                    |

Table S2. Cont.

| Name          | Mature miRNA                   | ML | CK reads | TR reads | Log <sub>2</sub> (TR/CK) |
|---------------|--------------------------------|----|----------|----------|--------------------------|
| sli-miR396f   | CAGTTCANTAAAGCTGTGGGA          | 21 | 6        | 1        | -2.36                    |
| sli-miR397a   | TCATTGAGTGCAGCGTTGATG          | 21 | 7        | 26       | 1.91                     |
| sli-miR397b   | ATTGAGTGCAGCGTTGATGAC          | 21 | 39       | 51       | 0.42                     |
| sli-miR398    | TGTGTTCTCAGGTCGCCCTG           | 21 | 2        | 6        | 1.45                     |
| sli-miR399a   | TGCCAAAGGAGAGTTGCCCTG          | 21 | 13       | 9        | -0.46                    |
| sli-miR399b   | GGGCTACACTCTATTGGCATG          | 21 | 10       | 5        | -1.14                    |
| sli-miR403a   | TTAGATTCACGCACAAACTCG          | 21 | 14,152   | 14,524   | 0.04                     |
| sli-miR403b   | TTAGATTCACGCACAAACT            | 19 | 57       | 63       | 0.16                     |
| sli-miR408a   | TGCACTGCCTCTTCCCTGGCT          | 21 | 221      | 189      | -0.22                    |
| sli-miR408b   | TGCACTGCCTCTTCCCTGGCTT         | 22 | 22       | 13       | -0.79                    |
| sli-miR482a   | TTCCAATTCCACCCATTCTA           | 22 | 194      | 316      | 0.71                     |
| sli-miR482b   | GATGATGATGATGATGA              | 17 | 11       | 6        | -0.72                    |
| sli-miR894    | TCACGTCGGGTTACCA               | 17 | 1,874    | 1,787    | -0.07                    |
| sli-miR1310a  | CTCGACCTATTCTCAAACCTTAAATA     | 26 | 65       | 83       | 0.35                     |
| sli-miR1310b  | CCCTCGACCTATTCTCAAACCTTAAATA   | 28 | 49       | 36       | -0.43                    |
| sli-miR1446   | TTTCTGAACTCTCTCCCTCAA          | 21 | 5        | 1        | -3.01                    |
| sli-miR1919   | TGTCGCAGATGACTTTCGCC           | 21 | 13       | 14       | 0.08                     |
| sli-miR2911a  | CCCAGTCCCGAACCCG               | 16 | 1,292    | 1,026    | -0.33                    |
| sli-miR2911b  | AACCCGTCGGCTGTCCG              | 17 | 104      | 151      | 0.54                     |
| sli-miR2911c  | CGGTGGACTGCTCGAGCTGCT          | 21 | 19,905   | 29,043   | 0.55                     |
| sli-miR2916a  | AACCATAAACGATGCCGACC           | 20 | 735      | 843      | 0.20                     |
| sli-miR2916b  | TCCTAGTCTCAACCATAAACGATGCCGACC | 30 | 268      | 267      | 0.00                     |
| sli-miR5072   | CCCCAGCGGAGTCGC                | 15 | 15       | 28       | 0.86                     |
| sli-miR5083a  | AGACTACAATTATCTGATCA           | 20 | 12       | 7        | -0.72                    |
| sli-miR5083b  | CAATGGATCCTTCTGAGCCT           | 20 | 58       | 49       | -0.25                    |
| sli-miR5139   | AACCTGGCTCTGATACCA             | 18 | 174      | 113      | -0.62                    |
| sli-miR5141   | AGACCCGACGCGACTGACAGA          | 21 | 15       | 9        | -0.72                    |
| sli-miR5300   | CCAGTCCAGGCATTCCAAC            | 19 | 75       | 20       | -1.92                    |
| sli-miR5301a  | TGTGGGTGGGGTGGAAAGATT          | 21 | 158      | 117      | -0.43                    |
| sli-miR5301b  | TCTTTCCTACTCCTCCCATACC         | 21 | 1,989    | 3,707    | 0.90                     |
| sli-miR5303   | GCTCGGACTCTCCAAAATGT           | 21 | 5        | 0        | -12.33                   |
| sli-miR157 *  | GCTCTCTATTCTTCTGTCATC          | 21 | 13       | 5        | -1.46                    |
| sli-miR165a * | GGAATGTTGTCTGGCTCGAC           | 20 | 55       | 43       | -0.34                    |
| sli-miR166a * | GGAATGTTGTCTGGCTCGGGG          | 21 | 7        | 16       | 1.25                     |
| sli-miR166e * | GGAATGTTGTTTGGCTCGAGG          | 21 | 1,534    | 879      | -0.80                    |
| sli-miR168b * | CCCGCCTTGCATCAACTGAAT          | 21 | 2,250    | 2,557    | 0.19                     |
| sli-miR3630 * | TGGGAATCTCTCTGATGCAC           | 20 | 33       | 33       | 0.03                     |
| sli-miR396a * | GTTCAATAAAGCTGTGGGAAG          | 21 | 322      | 310      | -0.05                    |

ML, Length of mature miRNA; The value of TR/CK is the ratio between normalized reads from library TR and CK;

“+” in Log<sub>2</sub>(TR/CK) means up-regulation; and “-” in Log<sub>2</sub>(TR/CK) means down-regulation.

**Table S3.** The Ct values of qRT-PCR.

|    | Repeat | U6    | miR156C | miR 166i | miR 167a | miR 397a | miR 403a | miR 5300 |
|----|--------|-------|---------|----------|----------|----------|----------|----------|
| CK | I      | 30.17 | 31.92   | 31.20    | 32.86    | 33.67    | 32.32    | 32.19    |
|    |        | 29.96 | 32.74   | 30.82    | 32.74    | 33.42    | 31.12    | 32.07    |
|    |        | 29.96 | 32.92   | 30.65    | 32.81    | 32.47    | 31.54    | 32.73    |
|    | II     | 29.98 | 32.12   | 31.25    | 32.86    | 33.45    | 32.00    | 32.18    |
|    |        | 30.14 | 32.58   | 30.72    | 32.84    | 33.55    | 31.59    | 32.11    |
|    |        | 29.94 | 32.78   | 30.65    | 32.79    | 32.65    | 31.89    | 32.63    |
|    | III    | 30.05 | 32.42   | 31.32    | 32.76    | 33.63    | 31.23    | 32.15    |
|    |        | 29.97 | 32.57   | 30.83    | 32.73    | 33.58    | 31.56    | 32.27    |
|    |        | 30.09 | 32.69   | 30.62    | 32.82    | 33.47    | 31.78    | 32.62    |
| TR | I      | 30.68 | 33.33   | 32.35    | 35.59    | 31.71    | 31.85    | 33.04    |
|    |        | 30.59 | 34.03   | 32.94    | 36.68    | 31.09    | 31.93    | 34.79    |
|    |        | 30.64 | 34.72   | 32.67    | 36.78    | 31.63    | 31.45    | 34.02    |
|    | II     | 30.55 | 34.32   | 32.30    | 35.63    | 31.54    | 32.02    | 33.17    |
|    |        | 30.62 | 33.89   | 32.89    | 36.64    | 31.29    | 31.6     | 34.44    |
|    |        | 30.70 | 33.72   | 32.67    | 36.71    | 31.51    | 31.44    | 34.20    |
|    | III    | 30.71 | 34.13   | 32.41    | 35.67    | 31.53    | 31.54    | 33.07    |
|    |        | 30.62 | 33.89   | 32.98    | 36.62    | 31.57    | 32.07    | 34.75    |
|    |        | 30.64 | 34.32   | 32.66    | 36.82    | 31.47    | 31.43    | 34.05    |

**Table S4.** Predicted targets of NaCl-responsive miRNAs.

| miRNA       | Predicted target                                   |
|-------------|----------------------------------------------------|
| sli-miR156b | SGN-U325281, SGN-U324312, SGN-U342074, SGN-U323360 |
| sli-miR156c | SGN-U317176, SGN-U317177, SGN-U313540, SGN-U319735 |
| sli-miR162b | Solyc10g005130.2.1                                 |
| sli-miR164c | SGN-U327571, SGN-U326326                           |
| sli-miR166d | Solyc11g011150.1.1                                 |
| sli-miR167a | SGN-U313907, SGN-U318676                           |
| sli-miR167b | Solyc03g095940.1.1                                 |
| sli-miR171b | SGN-U333058, SGN-U343385                           |
| sli-miR171e | SGN-U333058, SGN-U343385                           |
| sli-miR172a | SGN-U314859, SGN-U314861, SGN-U325104              |
| sli-miR319a | SGN-U319907, SGN-U324731, SGN-U323397              |
| sli-miR397a | SGN-U327694, SGN-U330286, SGN-U312405              |
| sli-miR399b | Solyc03g031410.1.1                                 |
| sli-miR5300 | SGN-U324648, SGN-U336733                           |
